# Supplementary material for: 4 V class aqueous hybrid electrochemical capacitor with battery-like capacity
Source: Royal Society of Chemistry journal article supplement (doi:10.1039/c2ra22265e), 2012-01-01
Supplement: c2ra22265e.pdf [file c2ra22265e.pdf]

## Supporting Materials for

### **4-V Class Aqueous Hybrid Electrochemical Capacitor with Battery-like Capacity**

Sho Makino,<sup>a</sup> Yuto Shinohara,<sup>a</sup> Takayuki Ban,<sup>a</sup> Wataru Shimizu,<sup>a</sup> Keita Takahashi,<sup>b</sup>  
Nobuyuki Imanishi,<sup>b</sup> and Wataru Sugimoto<sup>a\*</sup>

1) Materials and Chemical Engineering, Faculty of Textile Science and Technology, Shinshu  
University, 3-15-1 Tokida, Ueda, Nagano 386-8567, JAPAN

2) Department of Chemistry, Faculty of Engineering, Mie University, Mie 514-8507, JAPAN

\* wsugi@shinshu-u.ac.jp

## 1. Experimental details

### *Preparation of negative electrode:*

An ionic conducting poly(ethylene oxide) (PEO)-based polymer membrane of PEO-Li(CF<sub>3</sub>SO<sub>2</sub>)<sub>2</sub>N-BaTiO<sub>3</sub> was prepared by a casting technique reported previously.<sup>[19]</sup> PEO (Aldrich, average molecular weight: 6x10<sup>5</sup>) powder, and Li(CF<sub>3</sub>SO<sub>2</sub>)<sub>2</sub>N salt (LiTFSI, Wako) with Li/O=1/18 were completely dissolved in anhydrous acetonitrile. BaTiO<sub>3</sub> (Aldrich, 0.1 μm average particle size) was homogeneously dispersed in the PEO and LiTFSI solution with acetonitrile as a filler (10 wt%). The mixture was stirred at room temperature in an N<sub>2</sub>-filled dry glove box and was then cast into a clean Teflon dish. The acetonitrile solvent was slowly evaporated at room-temperature in the dry box for 10 h, and was then dried at 110°C for 10 h under vacuum. A water-stable LISICON-type glass ceramic, Li<sub>1+x+y</sub>Ti<sub>2-x</sub>Al<sub>x</sub>Si<sub>y</sub>P<sub>3-y</sub>O<sub>12</sub> (x~0.25, y~0.3, 150 μm thick), was supplied by Ohara Inc., Japan. To set up the multilayer water-stable Li electrode, the lithium metal with a Ni thin-film lead, the PEO<sub>18</sub>-LiTFSI-BaTiO<sub>3</sub> composite polymer electrolyte, and the LISICON plate were sandwiched between two pieces of plastic films with low water and gas permeabilities. The cell was evacuated and heat sealed leaving a 5 x 5 mm area window on the LTAP plate.

### *Preparation of positive electrodes:*

MnO<sub>2</sub> powder was prepared following previous reports.<sup>[18,21]</sup> Fumaric acid (C<sub>4</sub>H<sub>4</sub>O<sub>4</sub>, Aldrich) was added to a 0.2 M KMnO<sub>4</sub> solution (ultra pure water (> 18 M Ω cm)) in a 1:3 molar ratio while stirring. The resulting sol was degassed for 30 min under moderate vacuum and after a few hours, a black gel formed. The gel was washed carefully and dried in air. X-ray diffraction patterns were identical to those reported. The specific BET surface area measured by N<sub>2</sub> gas sorption was 235 m<sup>2</sup> g<sup>-1</sup>.

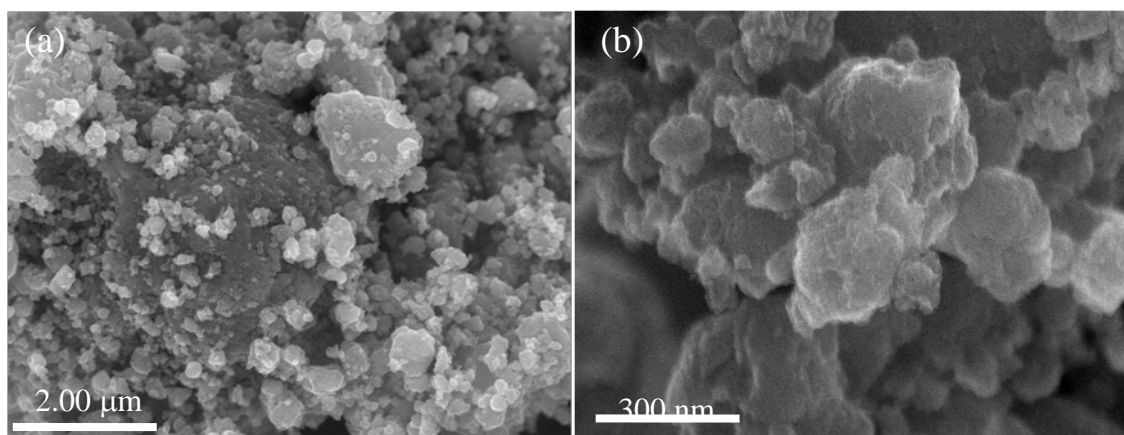

Figure S1. SEM images of MnO<sub>2</sub>.

RuO<sub>2</sub>·0.5H<sub>2</sub>O powder was prepared according to literature.<sup>[17]</sup> Slow controlled addition of a 0.3 M NaOH solution into 0.1 M RuCl<sub>3</sub>·xH<sub>2</sub>O solution resulted in precipitation of a black fine powder. The powder was washed thoroughly with ultra-pure water and collected by filtration. Then the powder was heat treated in air at 150°C for 17 h to obtain RuO<sub>2</sub>·0.5H<sub>2</sub>O. The capacitance of the material in 0.5 M H<sub>2</sub>SO<sub>4</sub> (25°C) at 2 mV s<sup>-1</sup> was 650 F g<sup>-1</sup>, in good agreement with literature.

RuO<sub>2</sub> nanosheets were prepared according to literature.<sup>[22]</sup> α-NaFeO<sub>2</sub>-structured NaRuO<sub>2</sub> was synthesized by heating a mixture of Na<sub>2</sub>CO<sub>3</sub> and Ru and RuO<sub>2</sub> (2: 1: 3 molar ratio) at 900°C for 12 h under flowing Ar. The obtained product was treated with aqueous Na<sub>2</sub>S<sub>2</sub>O<sub>8</sub> to prompt oxidative partial de-intercalation of Na ions and then 1 M HCl to exchange the interlayer Na<sup>+</sup> with H<sup>+</sup>, resulting in the formation of hydrated layered protonic ruthenate formulated as H<sub>0.2</sub>RuO<sub>2</sub>·0.5H<sub>2</sub>O. Vigorous shaking (at least 10 days) of the acid-treated sample (0.1 g) in 25 cm<sup>3</sup> of aqueous tetrabutylammonium hydroxide results in exfoliation of H<sub>0.2</sub>RuO<sub>2</sub>·0.5H<sub>2</sub>O into RuO<sub>2</sub> nanosheets. The resultant dark-green suspensions were centrifugated at 2000 rpm for 30 min to separate the exfoliated nanosheets and the readily sedimenting materials.
